# Supplementary material
Source: PubMed Central journal article supplement (PMC5373047)
Supplement: supp_pp.16.01499_PP2016-01499R2_Supplemental_Methods_.pdf [file supp_pp.16.01499_PP2016-01499R2_Supplemental_Methods_.pdf]

1 **Supporting Information**

2

3 **Histone lysine-to-methionine mutations reduce histone methylation and cause**  
4 **developmental pleiotropy**

5

6 Dean Sanders<sup>a,b</sup>, Shuiming Qian<sup>b</sup>, Rachael Fieweger<sup>a,b</sup>, Li Lu<sup>b</sup>, , James A. Dowell<sup>b</sup>, John M.  
7 Denu<sup>b,c</sup>, Xuehua Zhong<sup>a,b,1</sup>

8

9 <sup>a</sup>Laboratory of Genetics, University of Wisconsin-Madison, Madison, WI 53706

10 <sup>b</sup>Epigenetics Theme, Wisconsin Institute for Discovery, Madison, WI 53706

11 <sup>c</sup>Department of Biomolecular Chemistry, University of Wisconsin-Madison, Madison, WI 53706

12

13 <sup>1</sup>To whom correspondence should be addressed. Email: [xuehua.zhong@wisc.edu](mailto:xuehua.zhong@wisc.edu)

14

15

16

17

18

19

20

21

22

23

24 **SI Materials and Methods**

25 **RNA extraction and RT-PCR.** Total RNA was extracted from 0.2 g of plant tissue with Trizol  
26 (ThermoFisher). One microgram RNA pretreated with DNase I (M0303L, New England  
27 Biolabs) was reverse-transcribed into cDNA using oligoDT primers with superscript III reverse  
28 transcriptase according to the manufacturers instructions (ThermoFisher). PCR products were  
29 visualized by ethidium bromide staining with *ACTIN 7* as a control.

30  
31 **Gene Ontology analysis.** For GO analysis, both upregulated and downregulated genes  
32 (Supplemental table 1a,b) from M36 were utilized for a David functional annotation analysis  
33 (Huang da et al., 2009). *p*-values are reported as  $-\text{Log}_{10}$  *p*-value (Fig. 2B.).

34  
35 **Histone extractions.** Two grams of plant tissue were ground into powder and resuspended in 25  
36 mL extraction buffer (10mM HEPES pH 8.0, 1M sucrose, 5mM KCl, 5mM MgCl<sub>2</sub>, 0.6% triton  
37 X-100, 0.4mM PMSF, Pepstatin 1:1000, complete protease inhibitor) with dounce on ice. The  
38 extracts were filtered through two layers of miracloth on ice and spin down at 2,627 g for 10  
39 minutes. Nuclei were washed 4 times with extraction buffer and then resuspended into 1mL  
40 detergent extraction buffer (10mM Tris-HCl, 10mM NaCl, 3mM MgCl<sub>2</sub>, 1% triton with pH 7.4)  
41 for 5 minutes on ice. The solution was spun at 16,000 g for 5 min at room temperature. The  
42 nuclei were resuspended in 0.5mL of 0.4N H<sub>2</sub>SO<sub>4</sub> for 1hr at 4°C. After centrifuge (21,000 g for  
43 5 min at 4°C), supernatants were precipitated in 132 μL of TCA (99.9 % tricarboxylic acid +  
44 0.1% sodium deoxycholate), washed two times with acetone, and resuspended in 120 μL  
45 deionized water.

46

47 **Immunofluorescence.** Leaves from 21 day-old plants were diced into 1cm pieces and placed  
48 into ice-cold fixing buffer (4% paraformaldehyde, 10mM Tris-HCl, 100mM NaCl, 10mM  
49 EDTA) for 20 minutes. Fixed plant material was washed two times in fixing buffer without  
50 paraformaldehyde for 10 minutes/wash and chopped thoroughly in 500  $\mu$ L LOB1 buffer (15 mM  
51 Tris-HCl, 2 mM EDTA, 0.5 mM spermine, 80mM KCl, 20 mM NaCl, 0.1% Triton X-100). The  
52 nuclei were filtered through two layers of miracloth, diluted 1:3 in sorting buffer (100 mM Tris-  
53 HCl, 50mM KCl, 2 mM MgCl<sub>2</sub>, 0.05 % TWEEN 20, 5% sucrose), spotted onto pre-coated poly-  
54 lysine slides, and air dried for 4 hours. Slides were fixed in 1x KPBS (128 mM NaCl, 2 mM  
55 KCl, 8 mM Na<sub>2</sub>HPO<sub>4</sub>, 2 mM KH<sub>2</sub>P0<sub>4</sub>) plus 0.1% Triton-X100 and 4% paraformaldehyde for 5  
56 min at room temperature. Next, slides were blocked in 100  $\mu$ L 1% BSA in 1x KPBS at 37°C for  
57 30 min, washed three times with 1x KPBS plus 0.1% Triton-X100 for 5 minutes, and incubated  
58 with primary  $\alpha$ FLAG antibody (F3165, Sigma-Aldrich) at 4°C overnight. After overnight  
59 incubation, the slides were washed three times with 1x KPBS for 5 minutes and blocked with  
60 secondary antibody (VRDye 490, LI-COR) in a humid chamber for 2 hours. After three washes  
61 with 1x KPBS, samples were incubated with 30  $\mu$ L DAPI in mounting solution and imaged on a  
62 Nikon Ti Eclipse microscope.

63

64 **Mass spectrometry.** Acid extracted histones suspended in ddH<sub>2</sub>O were initially quantified using  
65 the Pierce BCA assay as per manufacturers instructions ([www.thermofisher.com](http://www.thermofisher.com)). 10  $\mu$ g of  
66 purified histones were prepared in 18  $\mu$ L ddH<sub>2</sub>O. 2  $\mu$ L of 1M TEAB was added with vortexing.  
67 Samples were labeled with 2 $\mu$ L of 1:100 diluted propionic anhydride (Sigma-Aldrich) with brief  
68 vortexing and 2 min incubation at room temperature. The reaction was quenched with 1 $\mu$ L  
69 80mM NH<sub>2</sub>OH. Samples were then trypsinized overnight at 37°C. Trypsinized peptides were N-

70 terminal labeled by adding 6  $\mu$ L of 2% phenylisocyanate in ACN in a fume hood (PIC is a potent  
71 inhalation hazard). Samples were incubated for 1 hour at 37°C with light shaking. Peptides were  
72 purified using an in-house packed C18 StageTip (3M Empore). Peptides were dried-down and  
73 then resuspended in 33  $\mu$ L of sample diluent (2% ACN, 0.5% Formic Acid).

74 Histone peptides were injected onto a Dionex Ultimate3000 nanoflow HPLC with a  
75 Waters NanoEase C18 column (100  $\mu$ m  $\times$  15 cm, 3  $\mu$ m) coupled to a Thermo Scientific Q-  
76 Exactive mass spectrometer at 700 nL/min. Mobile phases consisted of water + 0.1% formic acid  
77 (A) and acetonitrile + 0.1% formic acid (B). Histone peptides were resolved with a linear  
78 gradient of 2–25% (B) over 50 minutes and then to 40% (B) over 10 minutes. The mass  
79 spectrometer was operated in DDA mode with dynamic exclusion enabled (exclusion duration =  
80 8 s); MS1 resolution = 70,000; MS1 automatic gain control target =  $1 \times 10^6$ ; MS1 maximum fill  
81 time = 100 ms; MS2 resolution = 17,500; MS2 automatic gain control target =  $2 \times 10^5$ ; MS2  
82 maximum fill time = 500 ms; and MS2 normalized collision energy = 30. For each cycle, one  
83 full MS1 scan (300–1100 m/z) was followed by 10 MS2 scans using an isolation window size of  
84 2.0 m/z.

85 Raw data files were converted to mascot generic files (.mgf) via MSConvert (Chambers  
86 et al., 2012). Peptides were identified via Mascot database search engine (version: 2.2.07)  
87 (Perkins et al., 1999) using Arab\_TAIR database ([www.uniprot.org/](http://www.uniprot.org/)) with the following settings:  
88  $\leq 1$  missed cleavage, +2 and +3 charge state and  $\leq 5$  ppm peptide tolerance. Data files were  
89 combined to build spectral libraries in Skyline (MacLean et al., 2010). All peptides were  
90 quantified via MS1 peak area integration in Skyline. All histone peptide MS1 peaks and their  
91 integration bounds were verified using XCalibur Qual Browser (v2.2). The data was normalized

92 and reported as the percent total of the overall signal intensity for a particular peptide family as  
93 previously reported (Krautkramer et al., 2015).

94

95

96

97

98

99

100

101

102

103

104

105

106

107

108

109

110

111

112

113

114

115 **Supplemental References**

- 116 **Chambers MC, Maclean B, Burke R, Amodei D, Ruderman DL, Neumann S, Gatto L,**  
117 **Fischer B, Pratt B, Egertson J, Hoff K, Kessner D, Tasman N, Shulman N, Frewen**  
118 **B, Baker TA, Brusniak MY, Paulse C, Creasy D, Flashner L, Kani K, Moulding C,**  
119 **Seymour SL, Nuwaysir LM, Lefebvre B, Kuhlmann F, Roark J, Rainer P, Detlev S,**  
120 **Hemenway T, Huhmer A, Langridge J, Connolly B, Chadick T, Holly K, Eckels J,**  
121 **Deutsch EW, Moritz RL, Katz JE, Agus DB, MacCoss M, Tabb DL, Mallick P (2012)**  
122 **A cross-platform toolkit for mass spectrometry and proteomics. Nat Biotechnol 30:**  
123 **918-920**
- 124 **Huang da W, Sherman BT, Lempicki RA (2009) Systematic and integrative analysis of**  
125 **large gene lists using DAVID bioinformatics resources. Nat Protoc 4: 44-57**
- 126 **Krautkramer KA, Reiter L, Denu JM, Dowell JA (2015) Quantification of SAHA-**  
127 **Dependent Changes in Histone Modifications Using Data-Independent Acquisition**  
128 **Mass Spectrometry. J Proteome Res 14: 3252-3262**
- 129 **MacLean B, Tomazela DM, Shulman N, Chambers M, Finney GL, Frewen B, Kern R,**  
130 **Tabb DL, Liebler DC, MacCoss MJ (2010) Skyline: an open source document editor**  
131 **for creating and analyzing targeted proteomics experiments. Bioinformatics 26:**  
132 **966-968**
- 133 **Perkins DN, Pappin DJC, Creasy DM, Cottrell JS (1999) Probability-based protein**  
134 **identification by searching sequence databases using mass spectrometry data.**  
135 **Electrophoresis 20: 3551-3567**
- 136
